# Supplementary material
Source: PubMed Central journal article supplement (PMC3634378)
Supplement: 10.3163.1536-5050.101.2.010.sg001.pdf [file 10.3163.1536-5050.101.2.010.sg001.pdf]

## Analysis of inconsistencies in terminology of spinal and bulbar muscular atrophy and its effect on retrieval of research

Shelley D. Arvin, MIS

**Table 2**  
Frequency of all spinal and bulbar muscular atrophy (SBMA) name variants, 1968–2010

|                                                                       | Number of records | Percent of name variants* |
|-----------------------------------------------------------------------|-------------------|---------------------------|
| spinal and bulbar muscular atrophy                                    | 306               | 38.8%                     |
| Kennedy's disease                                                     | 161               | 20.4%                     |
| spinobulbar muscular atrophy                                          | 100               | 12.7%                     |
| Kennedy disease                                                       | 77                | 9.8%                      |
| X-linked spinal and bulbar muscular atrophy                           | 76                | 9.6%                      |
| bulbospinal muscular atrophy                                          | 51                | 6.5%                      |
| bulbospinal neuronopathy                                              | 49                | 6.2%                      |
| spinal bulbar muscular atrophy                                        | 42                | 5.3%                      |
| X-linked recessive bulbospinal neuronopathy                           | 30                | 3.8%                      |
| Kennedy syndrome                                                      | 23                | 2.9%                      |
| Spinal and bulbar muscular-atrophy                                    | 18                | 2.3%                      |
| Kennedy-alter-sung                                                    | 16                | 2.0%                      |
| Kennedy's syndrome                                                    | 16                | 2.0%                      |
| X-linked bulbospinal muscular atrophy                                 | 14                | 1.8%                      |
| X-linked bulbospinal neuronopathy                                     | 14                | 1.8%                      |
| X-linked recessive bulbospinal muscular atrophy                       | 14                | 1.8%                      |
| x-linked spinal and bulbar muscular-atrophy                           | 13                | 1.6%                      |
| X-linked spinobulbar muscular atrophy                                 | 13                | 1.6%                      |
| bulbo-spinal muscular atrophy                                         | 11                | 1.4%                      |
| bulbar and spinal muscular atrophy                                    | 10                | 1.3%                      |
| X-linked recessive spinal and bulbar muscular atrophy                 | 9                 | 1.1%                      |
| bulbar spinal muscular atrophy                                        | 8                 | 1.0%                      |
| bulbospinal muscular-atrophy                                          | 7                 | 0.9%                      |
| bulbo-spinal neuronopathy                                             | 6                 | 0.8%                      |
| Kennedy-Alter-Sung syndrome                                           | 6                 | 0.8%                      |
| Kennedy-alter-sung type                                               | 6                 | 0.8%                      |
| Progressive proximal spinal and bulbar muscular atrophy               | 6                 | 0.8%                      |
| progressive proximal spinal and bulbar muscular atrophy of late onset | 6                 | 0.8%                      |
| spinal and bulbar amyotrophy                                          | 6                 | 0.8%                      |
| Spinal-bulbar muscular atrophy                                        | 6                 | 0.8%                      |
| X-linked bulbo-spinal neuronopathy                                    | 6                 | 0.8%                      |
| bulbar-spinal muscular atrophy                                        | 5                 | 0.6%                      |
| bulbospinal amyotrophy                                                | 5                 | 0.6%                      |
| bulbo-spinal amyotrophy                                               | 5                 | 0.6%                      |
| bulbospinal muscular-atrophy of late onset                            | 4                 | 0.5%                      |
| progressive spinal and bulbar muscular atrophy                        | 4                 | 0.5%                      |
| X-linked bulbar and spinal muscular atrophy                           | 4                 | 0.5%                      |
| X-linked spinal and bulbar muscular atrophy of late onset             | 4                 | 0.5%                      |
| bulbospinal atrophy                                                   | 3                 | 0.4%                      |
| bulbospinal muscle atrophy                                            | 3                 | 0.4%                      |
| Kennedy-Alter-Sung disease                                            | 3                 | 0.4%                      |

|                                                                              | <b>Number<br/>of<br/>records</b> | <b>Percent of<br/>name<br/>variants*</b> |
|------------------------------------------------------------------------------|----------------------------------|------------------------------------------|
| Kennedys disease                                                             | 3                                | 0.4%                                     |
| Kennedy-type-bulbo-spinal amyotrophy                                         | 3                                | 0.4%                                     |
| spinal and bulbar Kennedy's amyotrophy                                       | 3                                | 0.4%                                     |
| spinal and bulbar muscle atrophy                                             | 3                                | 0.4%                                     |
| X-linked bulbo-spinal muscular atrophy                                       | 3                                | 0.4%                                     |
| X-linked recessive spinobulbar muscular atrophy                              | 3                                | 0.4%                                     |
| familial bulbo-spinal muscular atrophy                                       | 2                                | 0.3%                                     |
| hereditary proximal spinal and bulbar motor neuron disease                   | 2                                | 0.3%                                     |
| hereditary proximal spinal and bulbar motor neuron disease of late onset     | 2                                | 0.3%                                     |
| hereditary spinobulbar muscular atrophy                                      | 2                                | 0.3%                                     |
| Kennedy disease/spinal bulbar muscular atrophy                               | 2                                | 0.3%                                     |
| Kennedy's spinal amyotrophy                                                  | 2                                | 0.3%                                     |
| Kennedy's spinal and bulbar amyotrophy                                       | 2                                | 0.3%                                     |
| Kennedys-syndrom                                                             | 2                                | 0.3%                                     |
| Kennedy-Stefanis                                                             | 2                                | 0.3%                                     |
| Kennedy-syndrom                                                              | 2                                | 0.3%                                     |
| Late-onset X-linked recessive spinal and bulbar muscular atrophy             | 2                                | 0.3%                                     |
| progressive bulbar and spinal muscular atrophy                               | 2                                | 0.3%                                     |
| SBMA motor neuropathy                                                        | 2                                | 0.3%                                     |
| spinal/bulbar muscular atrophy                                               | 2                                | 0.3%                                     |
| X-linked bulbospinal amyotrophy                                              | 2                                | 0.3%                                     |
| X-linked bulbo-spinal neuronopathy (BSN) of late onset                       | 2                                | 0.3%                                     |
| X-linked bulbo-spinal neuronopathy of late onset                             | 2                                | 0.3%                                     |
| X-linked Kennedy's spinal and bulbar muscular atrophy                        | 2                                | 0.3%                                     |
| X-linked recessive bulbar spinal muscular atrophy                            | 2                                | 0.3%                                     |
| X-linked recessive bulbo-spinal muscular atrophy                             | 2                                | 0.3%                                     |
| X-linked recessive bulbospinal neuropathy                                    | 2                                | 0.3%                                     |
| X-linked spinal muscular atrophy                                             | 2                                | 0.3%                                     |
| adult onset spinal/bulbar muscular atrophy                                   | 1                                | 0.1%                                     |
| adult onset X-linked recessive bulbo-spinal muscular atrophy                 | 1                                | 0.1%                                     |
| adult sex-linked proximal hereditary motor neuropathy                        | 1                                | 0.1%                                     |
| adult spinal and bulbar muscular atrophy                                     | 1                                | 0.1%                                     |
| adult spinal and bulbar muscular atrophy with X-linked recessive inheritance | 1                                | 0.1%                                     |
| adult-onset bulbospinal neuronopathy                                         | 1                                | 0.1%                                     |
| adult-onset spinal and bulbar amyotrophy                                     | 1                                | 0.1%                                     |
| adult-type familial bulbospinal atrophy                                      | 1                                | 0.1%                                     |
| bulbar and spinal muscular atrophy of late onset                             | 1                                | 0.1%                                     |
| bulbar and spinal muscular atrophy of X-linked recessive trait               | 1                                | 0.1%                                     |
| bulbar-spinal amyotrophy                                                     | 1                                | 0.1%                                     |
| bulbar-spinal muscular atrophy (BSMA) of the Kennedy-Alter-Sung type         | 1                                | 0.1%                                     |
| bulbo spinal muscular atrophy                                                | 1                                | 0.1%                                     |
| bulbo spinal neuronopathy                                                    | 1                                | 0.1%                                     |
| bulbo-spinal lower motor neuron disease                                      | 1                                | 0.1%                                     |
| bulbospinal muscular atrophy of late onset                                   | 1                                | 0.1%                                     |
| bulbospinal muscular disease                                                 | 1                                | 0.1%                                     |
| bulbospinal muscular disease of the Kennedy-Alter-Sung type                  | 1                                | 0.1%                                     |
| chromosome X-linked recessive bulbospinal neuronopathy                       | 1                                | 0.1%                                     |
| chronic X-linked recessive spinal amyotrophy                                 | 1                                | 0.1%                                     |
| distal spinal bulbar muscular atrophy                                        | 1                                | 0.1%                                     |

|                                                                                 | <b>Number<br/>of<br/>records</b> | <b>Percent of<br/>name<br/>variants*</b> |
|---------------------------------------------------------------------------------|----------------------------------|------------------------------------------|
| early-onset and rapidly progressive X-linked spinal and bulbar muscular atrophy | 1                                | 0.1%                                     |
| familial bulbar spinal muscular-atrophy                                         | 1                                | 0.1%                                     |
| familial bulbospinal atrophy                                                    | 1                                | 0.1%                                     |
| familial bulbospinal muscular-atrophy                                           | 1                                | 0.1%                                     |
| Familial bulbospinal neuronopathy                                               | 1                                | 0.1%                                     |
| familial progressive bulbar and spinal muscular atrophy                         | 1                                | 0.1%                                     |
| Familial progressive bulbar-spinal muscular atrophy                             | 1                                | 0.1%                                     |
| Hereditary proximal spina; and bulbar motor neuron disease                      | 1                                | 0.1%                                     |
| hereditary motor neuron disease: The proximal, adult, sex-linked form           | 1                                | 0.1%                                     |
| hereditary proximal spina; and bulbar motor neuron disease of late onset        | 1                                | 0.1%                                     |
| Idiopathic bulbo-spinal muscle atrophy                                          | 1                                | 0.1%                                     |
| Kennedy Alter-Sung syndrome                                                     | 1                                | 0.1%                                     |
| Kennedy disease/syndrome                                                        | 1                                | 0.1%                                     |
| Kennedy gene                                                                    | 1                                | 0.1%                                     |
| Kennedy syndrome—bulbo-spinal muscular atrophy                                  | 1                                | 0.1%                                     |
| Kennedy type of SMA                                                             | 1                                | 0.1%                                     |
| Kennedy-Alter-Sung (KAS) disease                                                | 1                                | 0.1%                                     |
| Kennedy-alter-sung (kas) syndrome                                               | 1                                | 0.1%                                     |
| Kennedy-Alter-Sung syndrome-like proximal dominant neurogenic atrophy           | 1                                | 0.1%                                     |
| Kennedy-Alter-Sung type bulbo-spinal muscular atrophy                           | 1                                | 0.1%                                     |
| Kennedy-Alter-Sung type spinal muscular atrophy                                 | 1                                | 0.1%                                     |
| Kennedy's bulbospinal atrophy                                                   | 1                                | 0.1%                                     |
| Kennedy's medullo-spinal amyotrophy                                             | 1                                | 0.1%                                     |
| Kennedy's neuron disease                                                        | 1                                | 0.1%                                     |
| Kennedys syndrome                                                               | 1                                | 0.1%                                     |
| Kennedy's X-linked bulbospinal amyotrophy                                       | 1                                | 0.1%                                     |
| Kennedys-disease                                                                | 1                                | 0.1%                                     |
| Kennedy-Stefanis chronic spinal amyotrophy                                      | 1                                | 0.1%                                     |
| Kennedy-Stefanis disease                                                        | 1                                | 0.1%                                     |
| Kennedy-stefanis type                                                           | 1                                | 0.1%                                     |
| Kennedy-Syndrome                                                                | 1                                | 0.1%                                     |
| late onset progressive bulbar and spinal muscular atrophy                       | 1                                | 0.1%                                     |
| Late onset x linked recessive spinal and bulbar muscular atrophy                | 1                                | 0.1%                                     |
| Late onset x-linked progressive spinal muscular atrophy                         | 1                                | 0.1%                                     |
| late onset X-linked recessive bulbospinal neuronopathy                          | 1                                | 0.1%                                     |
| late progressive recessive X-linked proximal spinal and bulbar amyotrophy       | 1                                | 0.1%                                     |
| late recessive X-linked Kennedy's spinal and bulbar amyotrophy                  | 1                                | 0.1%                                     |
| late recessive x-linked spinal and bulbar kennedy's amyotrophy                  | 1                                | 0.1%                                     |
| muscular atrophy, spinal and bulbar (SBMA), X-linked Kennedy type               | 1                                | 0.1%                                     |
| progressive bulbar-spinal amyotrophy                                            | 1                                | 0.1%                                     |
| Progressive bulbospinal amyotrophy                                              | 1                                | 0.1%                                     |
| progressive bulbospinal muscular atrophy of sex-linked recessive trait          | 1                                | 0.1%                                     |
| progressive spinal/bulbar muscular atrophy                                      | 1                                | 0.1%                                     |
| proximal spinal muscular atrophy                                                | 1                                | 0.1%                                     |
| Pseudomyopathic spinal amyotrophy                                               | 1                                | 0.1%                                     |
| recessive x-coupled kennedy spinal and bulbar amyotrophy                        | 1                                | 0.1%                                     |
| recessive X-linked amyotrophic spinobulbar muscular atrophy                     | 1                                | 0.1%                                     |

|                                                                        | <b>Number<br/>of<br/>records</b> | <b>Percent of<br/>name<br/>variants*</b> |
|------------------------------------------------------------------------|----------------------------------|------------------------------------------|
| sex-linked proximal hereditary motor neuropathy                        | 1                                | 0.1%                                     |
| sex-linked recessive bulbar spinal muscular atrophy                    | 1                                | 0.1%                                     |
| spinal and bulb muscular atrophy                                       | 1                                | 0.1%                                     |
| spinal and bulbar (SBMA), X-linked Kennedy type                        | 1                                | 0.1%                                     |
| spinal and bulbar muscular atrophy with X-linked recessive inheritance | 1                                | 0.1%                                     |
| spinal and bulbar muscular dystrophy                                   | 1                                | 0.1%                                     |
| spinal and bulbular atrophy                                            | 1                                | 0.1%                                     |
| spinal bulbar and muscular atrophy                                     | 1                                | 0.1%                                     |
| spinal muscular atrophy (SMA) of Kennedy type                          | 1                                | 0.1%                                     |
| spinal muscular atrophy of the Kennedy type                            | 1                                | 0.1%                                     |
| spinal-and-bulbar-muscular-atrophy                                     | 1                                | 0.1%                                     |
| spino bulbar muscular atrophy                                          | 1                                | 0.1%                                     |
| spinobulbar amyotrophy                                                 | 1                                | 0.1%                                     |
| spinobulbar and muscular atrophy                                       | 1                                | 0.1%                                     |
| spino-bulbar muscular atrophy                                          | 1                                | 0.1%                                     |
| spinobulbare muskelatrophie                                            | 1                                | 0.1%                                     |
| spinobulbomuscular atrophy                                             | 1                                | 0.1%                                     |
| type Kennedy                                                           | 1                                | 0.1%                                     |
| x chromosomal bulbospinal neuropathy                                   | 1                                | 0.1%                                     |
| X chromosome associated progressive bulbospinal neuropathy             | 1                                | 0.1%                                     |
| x chromosome-linked bulbospinal neuronopathy                           | 1                                | 0.1%                                     |
| X chromosome-linked spinal muscular atrophy                            | 1                                | 0.1%                                     |
| X linked spinobulbar muscular atrophy                                  | 1                                | 0.1%                                     |
| X-BSMA with neuropathy                                                 | 1                                | 0.1%                                     |
| x-chromosomal bulbospinal muscular atrophy                             | 1                                | 0.1%                                     |
| X-chromosomal recessive bulbospinal neuronopathy                       | 1                                | 0.1%                                     |
| x-chromosomal recessive spinobulbar muscular atrophy                   | 1                                | 0.1%                                     |
| x-chromosomal recessive spinobulbar muscular atrophy (type Kennedy)    | 1                                | 0.1%                                     |
| X-chromosome linked bulbospinal muscular atrophy                       | 1                                | 0.1%                                     |
| X-chromosome-linked adult bulbospinal neuronopathy                     | 1                                | 0.1%                                     |
| X-linked adult-onset bulbospinal muscular atrophy                      | 1                                | 0.1%                                     |
| X-linked adult-onset SBMA                                              | 1                                | 0.1%                                     |
| X-linked bulbar spinal muscular atrophy                                | 1                                | 0.1%                                     |
| X-linked bulbospinal muscular atrophy Kennedy                          | 1                                | 0.1%                                     |
| X-linked bulbospinal muscular-atrophy                                  | 1                                | 0.1%                                     |
| X-linked bulbospinal neuronopathy Kennedy                              | 1                                | 0.1%                                     |
| X-linked bulbospinomuscular atrophy                                    | 1                                | 0.1%                                     |
| X-linked muscular atrophy                                              | 1                                | 0.1%                                     |
| X-linked muscular-atrophy                                              | 1                                | 0.1%                                     |
| x-linked progressive spinal muscular atrophy                           | 1                                | 0.1%                                     |
| X-linked proximal spinal and bulbar amyotrophy                         | 1                                | 0.1%                                     |
| X-linked recessive bulbar-spinal muscular atrophy                      | 1                                | 0.1%                                     |
| X-linked recessive bulbospinal amyotrophy                              | 1                                | 0.1%                                     |
| x-linked recessive bulbospinal muscular-atrophy                        | 1                                | 0.1%                                     |
| x-linked recessive bulbo-spinal muscular-atrophy                       | 1                                | 0.1%                                     |
| X-linked recessive bulbo-spinal neuronopathy                           | 1                                | 0.1%                                     |
| X-linked recessive spinal amyotrophy                                   | 1                                | 0.1%                                     |
| x-linked recessive spinal and bulbar muscular-atrophy                  | 1                                | 0.1%                                     |
| X-linked spinal and bulbal muscular atrophy                            | 1                                | 0.1%                                     |
| X-linked spinal and bulbar atrophy of late onset                       | 1                                | 0.1%                                     |

|                                                               | <b>Number<br/>of<br/>records</b> | <b>Percent of<br/>name<br/>variants*</b> |
|---------------------------------------------------------------|----------------------------------|------------------------------------------|
| X-linked spinal and bulbar muscular-atrophy of late onset     | 1                                | 0.1%                                     |
| X-linked spinal bulbar and muscular atrophy                   | 1                                | 0.1%                                     |
| x-linked spinal bulbar muscular-atrophy                       | 1                                | 0.1%                                     |
| X-linked spino-bulbar muscular atrophy                        | 1                                | 0.1%                                     |
| X-linked spinomuscular atrophy                                | 1                                | 0.1%                                     |
| X-linked: spinobulbar muscular atrophy                        | 1                                | 0.1%                                     |
| bulbar spinal neuronopathy                                    | 0                                | —                                        |
| bulbar-spinal muscular-atrophy                                | 0                                | —                                        |
| bulbar-spinal neuronopathy                                    | 0                                | —                                        |
| bulbo-SMA                                                     | 0                                | —                                        |
| Kennedy-disease                                               | 0                                | —                                        |
| Kennedy's-disease                                             | 0                                | —                                        |
| Kennedy's-syndrome                                            | 0                                | —                                        |
| Kennedy-Stefanis syndrome                                     | 0                                | —                                        |
| Spinobulbornuscular atrophy                                   | 0                                | —                                        |
| x chromosomal bulbospinal neuronopathy                        | 0                                | —                                        |
| X-linked bulbospino muscular-atrophy                          | 0                                | —                                        |
| X-linked spinal and bulbar muschular atrophy                  | 0                                | —                                        |
| x-linked spinal bulbar muscular atrophy                       | 0                                | —                                        |
| Total records                                                 | 1,352                            |                                          |
| Total all SBMA variants (with duplicates) count for each year | 788                              |                                          |
| All SBMA variants (without duplicates) count for each year    | 756                              |                                          |

\* Records may appear in more than one category. Percentage is the percentage of all name variants (788), not of unique records.
